# Supplementary material
Source: PubMed Central journal article supplement (PMC4717489)
Supplement: NIHMS724798-supplement-01.pdf [file NIHMS724798-supplement-01.pdf]

**Supplementary Methods and Results for**

**Modulation of Red Blood Cell Population Dynamics is a  
Fundamental Homeostatic Response to Disease**

**Contents**

Supplementary Methods ..... 2

    Reticulocyte and Complete Blood Counts ..... 2

    Other Clinical Laboratory Testing ..... 3

    Modeling RBC Population Dynamics..... 4

    Random Selection of Complete Blood Counts (“Correlation Cohort”)..... 10

    Identification of Healthy Patients (“Healthy Patient Cohort”) ..... 10

    Case Control Study of RDW and  $v_c$  Association with All-Cause Mortality (“Mortality Rate Cohort”) .... 11

    Prospective Study of Dependence of Glycated Hemoglobin Fraction on  $v_c$  (“A1c Cohort”) ..... 11

    Case Control Study of  $v_c$ -based Prediction of All-Cause Anemia (“Anemia Prediction Cohort”) ..... 12

    Prospective Study of Ferritin Levels (“Ferritin Cohort”) ..... 13

Supplementary Results ..... 14

    HCT variability in a healthy population..... 14

        Figure S-3. Variation in hematocrit (%) in a healthy cohort of 600 individuals. .... 14

    rRDW variability in a healthy population..... 15

        Figure S-4. Reticulocyte volume variation (rRDW) for 600 healthy individuals..... 15

    RBC Population Dynamics in a Healthy Population ..... 16

        Figure S-5. Estimated Parameters for RBC Population Dynamics in a Healthy Population ..... 16

    Correlation Between RDW and Potential Causes of its Elevation. .... 17

        Figure S-6. Correlation of RDW with possible cause for its elevation ..... 17

    Odds Ratios of Future Anemia for Thresholds of CBC parameters and  $v_c$ ..... 17

        Table S3. Odds Ratios of Future Anemia for Thresholds of CBC parameters and  $v_c$  ..... 18

    Glycated Hemoglobin is Elevated in Non-Diabetics with Normal CBCs and Decreased Ferritin ..... 19

        Figure S-7. Decreased ferritin with normal CBC and low  $v_c$  is associated with longer RBC lifespan . 19

## Supplementary Methods

### Reticulocyte and Complete Blood Counts

We measured CBCs and reticulocyte counts for more than 60,000 randomly selected blood samples. Blood samples were randomly selected from among those sent to the Massachusetts General Hospital (MGH) Clinical Hematology Laboratory. We measured an average of 150 CBCs and reticulocyte counts per day for 18 months. All reticulocyte and complete blood counts (CBCs) used in modeling were measured on an Abbott Cell-DYN Sapphire 4000 automated hematology analyzer (Abbott Hematology, Santa Clara, California). For each CBC and reticulocyte count, this instrument measures the volume and hemoglobin concentration of approximately 50,000 individual RBCs. Both volume and hemoglobin concentration are measured for each individual RBC, yielding the joint volume-hemoglobin distribution for the entire population of 50,000 RBCs. RBC population modeling has been validated on the Abbott Cell-DYN Sapphire 4000 as well as Siemens Advia 120, 2120, and 2120i instruments.

All CBC parameters used in hypothesis testing were measured on current instruments of record in the MGH Clinical Hematology Laboratory. Instruments included the Siemens Advia 2120 and the Sysmex XE-5000. All reference ranges used in this study were identical to those in place at MGH at the time of each test.

**Table S1. Normal Ranges for Complete Blood Counts**

| TEST (units)                       | POPULATION            | NORMAL RANGE |
|------------------------------------|-----------------------|--------------|
| RBC<br>(millions/mm <sup>3</sup> ) | ADULT MALES >18 YEARS | 4.50-5.90    |
|                                    | ADULT FEMALES >18 YRS | 4.00-5.20    |
|                                    | MALE 12-18 YEARS      | 4.50-5.30    |
|                                    | FEMALE 12-18 YEARS    | 4.10-5.10    |
| HGB (g/dl)                         | ADULT MALES >18 YEARS | 13.5-17.5    |
|                                    | ADULT FEMALES >18 YRS | 12.0-16.0    |
|                                    | MALE 12-18 YEARS      | 13.0-16.0    |
|                                    | FEMALE 12-18 YEARS    | 12.0-16.0    |
| HCT (%)                            | ADULT MALES >18 YEARS | 41.0-53.0    |
|                                    | ADULT FEMALES >18 YRS | 36.0-46.0    |
|                                    | MALE 12-18 YEARS      | 37.0-49.0    |
|                                    | FEMALE 12-18 YEARS    | 36.0-46.0    |
| MCV (fl)                           | ALL ADULTS >18 YEARS  | 80-100       |
|                                    | MALE 12-18 YEARS      | 78-98        |
|                                    | FEMALE 12-18 YEARS    | 78-102       |
| MCH (pg/RBC)                       | ADULT >18 YEARS       | 26.0-34.0    |
|                                    | 12-18 YEARS           | 25.0-35.0    |
| MCHC (g/dl)                        | ALL >2 YEARS          | 31.0-37.0    |
| RDW (%)                            | ALL                   | 11.5-14.5    |

Other Clinical Laboratory Testing

CBC and reticulocyte counts for each blood sample were modeled as described below. Blood samples with appropriate CBC parameters and clearance thresholds ( $v_c$ ) were then selected for further measurement of ferritin and hemoglobin A1c. Ferritin levels were measured on a Roche

COBAS instrument (Roche Diagnostics, Indianapolis, Indiana). Glycated hemoglobin was measured on a BIO-RAD Variant II Turbo instrument (BIO-RAD, Hercules, California).

**Table S2. Normal Ranges for Clinical Laboratory Tests**

| TEST (units)       | POPULATION   | NORMAL RANGE |
|--------------------|--------------|--------------|
| Glucose (mg/dl)    | ALL          | 70 - 110     |
| Hemoglobin A1c (%) | ALL          | 3.8 - 6.4    |
| Ferritin (ng/ml)   | ADULT MALE   | 30-300       |
|                    | ADULT FEMALE | 10-200       |

### Modeling RBC Population Dynamics

We used routine complete blood and reticulocyte count data and a mathematical model of *in vivo* RBC population dynamics to infer single-RBC rates of maturation and clearance for individual patients [1]. See Figures 1, S-1, and S-2. RBCs become smaller and lose hemoglobin as they age, with an initial fast phase of reduction followed by a slow phase [2-5]. The rates of the initial fast phase are quantified for each individual by model parameters  $\beta_v$  and  $\beta_h$ . The model quantifies the slower rate with the parameter  $\alpha$ . Rates of volume and hemoglobin reduction vary for a single RBC over time and from one RBC to the next in the population. The model enables estimation of the magnitude of variation in rates of both hemoglobin ( $D_h$ ) and volume reduction ( $D_v$ ). The molecular trigger and mechanism for RBC clearance are not fully understood [6], but common proposed mechanisms and empirical measurements of RBC populations such as those in Figure 1 (red contours) show that the probability of clearance is correlated with an RBC's volume and hemoglobin, and the true clearance function can be approximated as a threshold function of RBC volume and hemoglobin. As shown in Figure S-2, the probability of clearance for a particular RBC increases rapidly to 100% as the cell nears the clearance threshold, a line perpendicular to and

intersecting the MCHC (mean corpuscular hemoglobin concentration) line at a volume equal to  $v_c$ . An RBC with a hemoglobin concentration equal to the MCHC will be most likely to be recycled when its volume reaches  $v_c$ . RBCs with higher hemoglobin concentrations will circulate until reaching slightly lower volumes, and RBCs with lower hemoglobin concentrations will be cleared at slightly higher volumes. Details of model derivation, validation, and parameter estimation have previously been published [1].

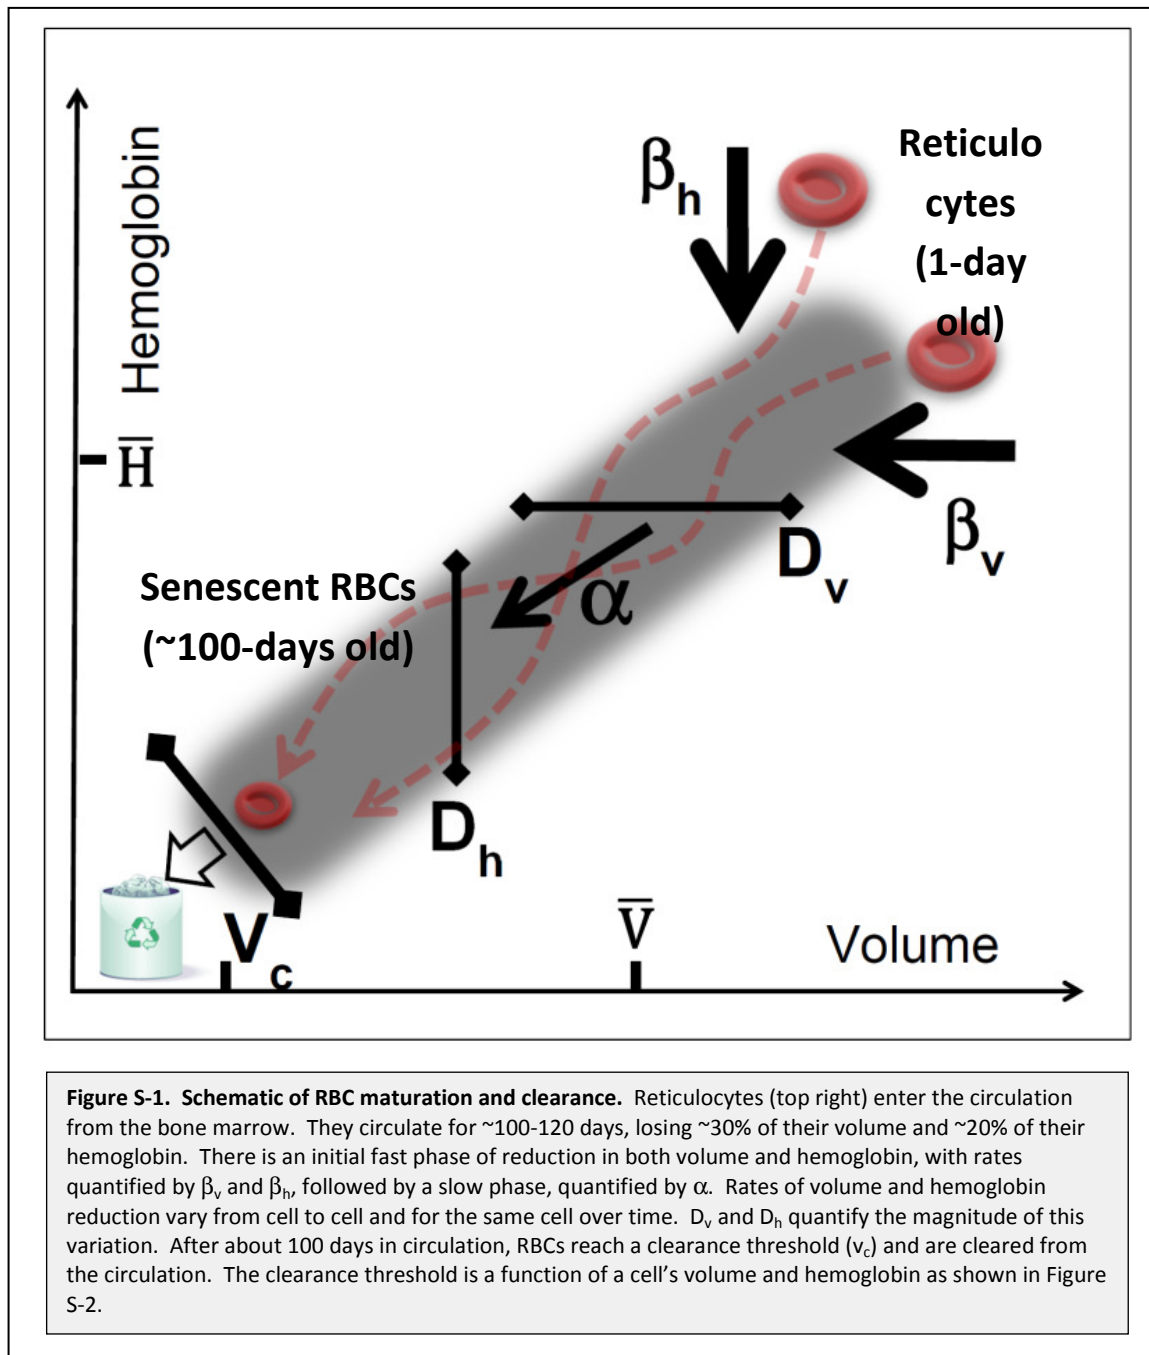

The molecular and biophysical mechanisms for these maturation and clearance processes are unclear and likely involve multiple types of cells operating at distributed locations *in vivo* and consequently present significant experimental challenges for direct characterization. Because the probability of clearance for a particular cell correlates so strongly with its volume and hemoglobin,

we can use those quantities to estimate an RBC's probability of clearance even though we do not expect that either volume or hemoglobin *per se* is the actual trigger for clearance.

A mathematical model of RBC population dynamics [1] enables us to estimate typical rates for these *in vivo* maturation processes using measurements of single-RBC volume and hemoglobin concentration. The model (Equation 1) describes the volume and hemoglobin dynamics of a typical RBC ( $\frac{dv}{dt}, \frac{dh}{dt}$ ) as a function ( $f$ ) of its current volume and hemoglobin and accounting for fluctuations in these rates of volume and hemoglobin loss over time ( $\zeta$ ). The dynamics of volume and hemoglobin in the full RBC population ( $\frac{dP}{dt}$ ) include production of reticulocytes ( $b$ ) and clearance of senescent cells ( $c$ ).

(1)

$$\begin{bmatrix} dv \\ dh \end{bmatrix} = \mathbf{f} dt + d\xi(t)$$

$$\mathbf{f} = \begin{cases} -\alpha \cdot e^{\beta_v(v-h)} \\ -\alpha \cdot e^{\beta_h(h-v)} \end{cases}$$

$$\xi(t) = \begin{cases} \sqrt{2D_v} \cdot B^1(t) \\ \sqrt{2D_h} \cdot B^2(t) \end{cases}$$

$B^i(t)$  are independent Brownian motion.

$$\frac{dP(v, h, t)}{dt} = -\nabla(P\mathbf{f}) + \nabla(\mathbf{D}\nabla P) + \mathbf{b}(v, h) - c(v, h) \cdot P$$

$b(v, h)$  is the scaled empirical reticulocyte distribution.

$$c(v, h) = \frac{1}{1 + e^{\Delta(v, h)}}$$

$$\Delta(v, h) = 100 \frac{\cos(\theta) \sqrt{v^2 + h^2} - v_c \sqrt{\bar{v}^2 + \bar{h}^2}}{v_c \sqrt{\bar{v}^2 + \bar{h}^2}}$$

$$\theta = \tan^{-1} \left( \frac{\bar{h}}{\bar{v}} \right) - \tan^{-1} \left( \frac{h}{v} \right)$$



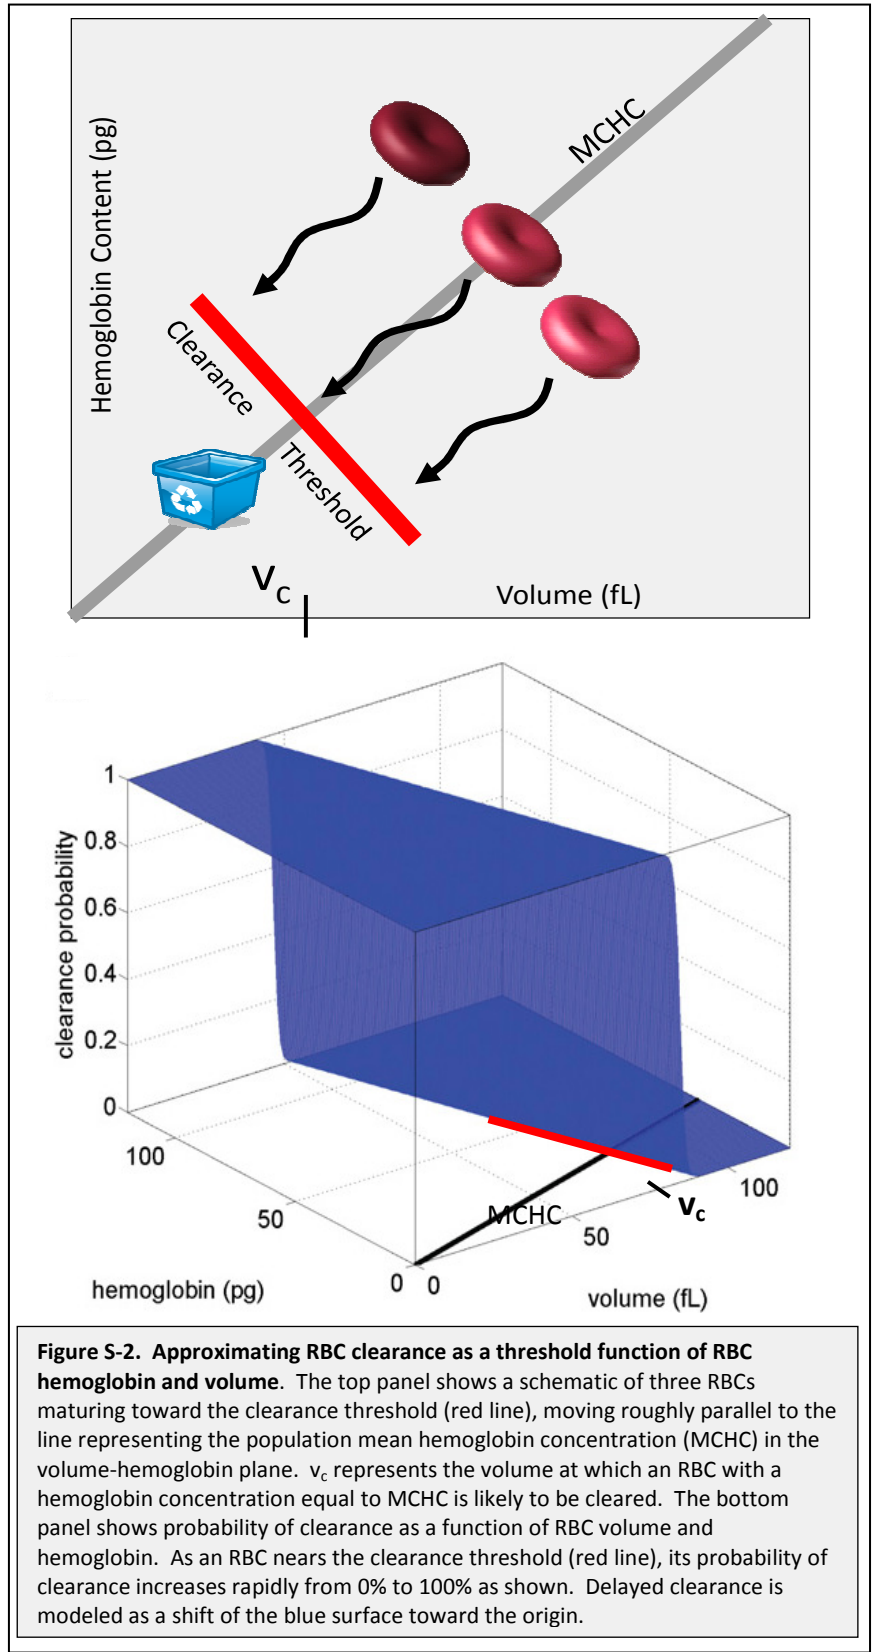

Parameter estimation is robust to the mild erythropoietic perturbations expected even for the wide range of conditions show to be associated with elevated RDW. Estimated parameters are less accurate in rapidly changing or severe conditions such as acute blood loss or significant hemolysis. In more mild cases of conditions associated with hemolysis like thalassemia trait or iron deficiency both from occult GI bleeding and nutritional deficiency, the model-based estimates of parameters are stable and show slight extensions of RBC lifespan, consistent with prior reports [7-10].

#### Random Selection of Complete Blood Counts (“Correlation Cohort”)

To assess the correlation between the possible causes of elevated and RDW across a general inpatient and outpatient hospital patient population, we randomly selected 450 blood samples from the MGH Clinical Laboratory over the course of 4 weeks. At different times each day, we selected the most recently analyzed rack of tubes for the study. This cohort was 45% male, with a median age of 59 years and an interquartile range of 26 years. There was no overlap between this patient cohort and any of the others. The specific correlation coefficients calculated may not apply to other hospitals or clinics where the average level of patient severity and complexity differs.

#### Identification of Healthy Patients (“Healthy Patient Cohort”)

We defined healthy patients as those who met the following criteria:

- (1) The patient had at least three CBCs spanning at least 3 years.
- (2) The patient had no recorded abnormal CBC index. See Table 1 for normal ranges.

It is possible that individuals with significant morbidity due to chronic illness may still meet these criteria. A manual review of randomly selected medical records suggests that the prevalence of chronic illness is below 5% and likely well below 2%. We use this healthy population to estimate a lower bound on the typical variation of clinical parameters in a truly healthy population. Rare

biological outliers will therefore have little impact. Also, we only compare measurements in this cohort against other measurements made in this cohort and therefore provide some control for the potential bias caused by the inadvertent inclusion of a small number of individuals with chronic illness. This cohort was 43% male, with a median age of 53 years and an interquartile range of 23 years. There was no overlap between this patient cohort and any of the others.

#### Case Control Study of RDW and $v_c$ Association with All-Cause Mortality (“Mortality Rate Cohort”)

We measured CBCs and reticulocyte counts for patients randomly selected from among those who had complete blood counts ordered as part of their medical care at MGH between June, 2012, and December 2013. We identified 900 of those patients (“cases”) who had died by June, 2014, according to the Social Security Death Master File. For each case, we identified another patient (“controls”) who

- (1) had the same gender as the case
- (2) had a date of birth within one year of the case
- (3) had a CBC and reticulocyte measurement within 30 days of the case
- (4) was not reported as deceased in the Social Security Death Master File.

We control for some potential biases in patient selection by selecting cases and controls from this same cohort and by matching them for age, gender, and timing of the CBC used for the comparison. There was no overlap between this patient cohort and any of the others. The patients in this cohort were 50% female and had a median age of 71 years with an interquartile range of 26 years.

#### Prospective Study of Dependence of Glycated Hemoglobin Fraction on $v_c$ (“A1c Cohort”)

We assessed the relationship between  $v_c$  and glycated hemoglobin fraction for non-diabetic individuals. “Non-diabetic” individuals were those who met the following criteria:

- (1) Normal non-fasting glucose at the time of the complete blood count
- (2) No diagnosis of diabetes in the individual’s medical record
- (3) No recorded abnormally high glucose measurements within the two years prior to the CBC
- (4) No hemoglobin A1c measurement outside the reference range

There was no overlap between this patient cohort and any of the others. The patients in this cohort were 47% male and had a median age of 52 years with an interquartile range of 30 years. See Table 2 for normal ranges.

#### Case Control Study of $v_c$ -based Prediction of All-Cause Anemia (“Anemia Prediction Cohort”)

We determined the odds ratio for  $v_c$  and subsequent all-cause anemia. We were interested in assessing the predictive efficiency of  $v_c$  in identifying previously hematologically stable patients with a latent condition that might lead to future anemia.

Case patients were individuals presenting with mild anemia who had been hematologically stable within the prior 3 months. Mild anemia was defined as an HCT no more than 10% below the lower limit of the HCT reference range, or  $33\% \leq \text{HCT} < 36\%$  for females, and  $37\% \leq \text{HCT} < 41\%$  for males. Hematologic stability was defined by the following criteria:

- (1) No anemic CBC in the prior 6 months
- (2) No CBC within the prior 30 days
- (3) No transfusion or surgery in the prior 6 months

Control patients were hematologically stable individuals with exactly two completely normal CBCs separated by between 10 and 14 months, where the second HCT was no less than the first HCT. There was no overlap between this patient cohort and any of the others. The patients in this cohort were 35% male and had a median age of 54 years with an interquartile range of 30 years. See Table 2 for normal ranges.

#### Prospective Study of Ferritin Levels (“Ferritin Cohort”)

We measured ferritin levels in hematologically stable patients with completely normal CBCs and a range of  $v_c$ . We defined hematologically stable patients as those meeting the following criteria:

- (1) No anemia in the previous 6 months
- (2) No hospital visits in the prior 30 days

We define decreased iron stores as a ferritin in the bottom 5 percent of the normal range or below, which was equivalent to a ferritin < 20 ng/dl for females (normal range 10-200) and a ferritin < 44 ng/dl for males (normal range 30-300). There was no overlap between this patient cohort and any of the others. The patients in this cohort were 39% male and had a median age of 59 years with an interquartile range of 26 years.

## Supplementary Results

### HCT variability in a healthy population.

Figure S-3. Variation in hematocrit (%) in a healthy cohort of 600 individuals.

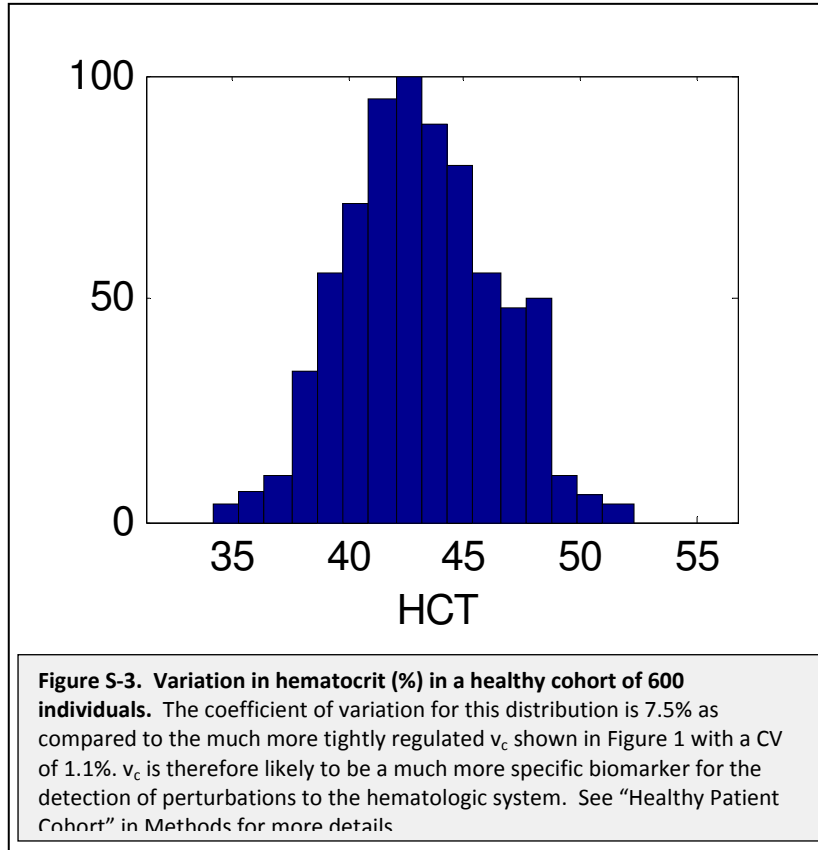

rRDW variability in a healthy population.

**Figure S-4. Reticulocyte volume variation (rRDW) for 600 healthy individuals.**

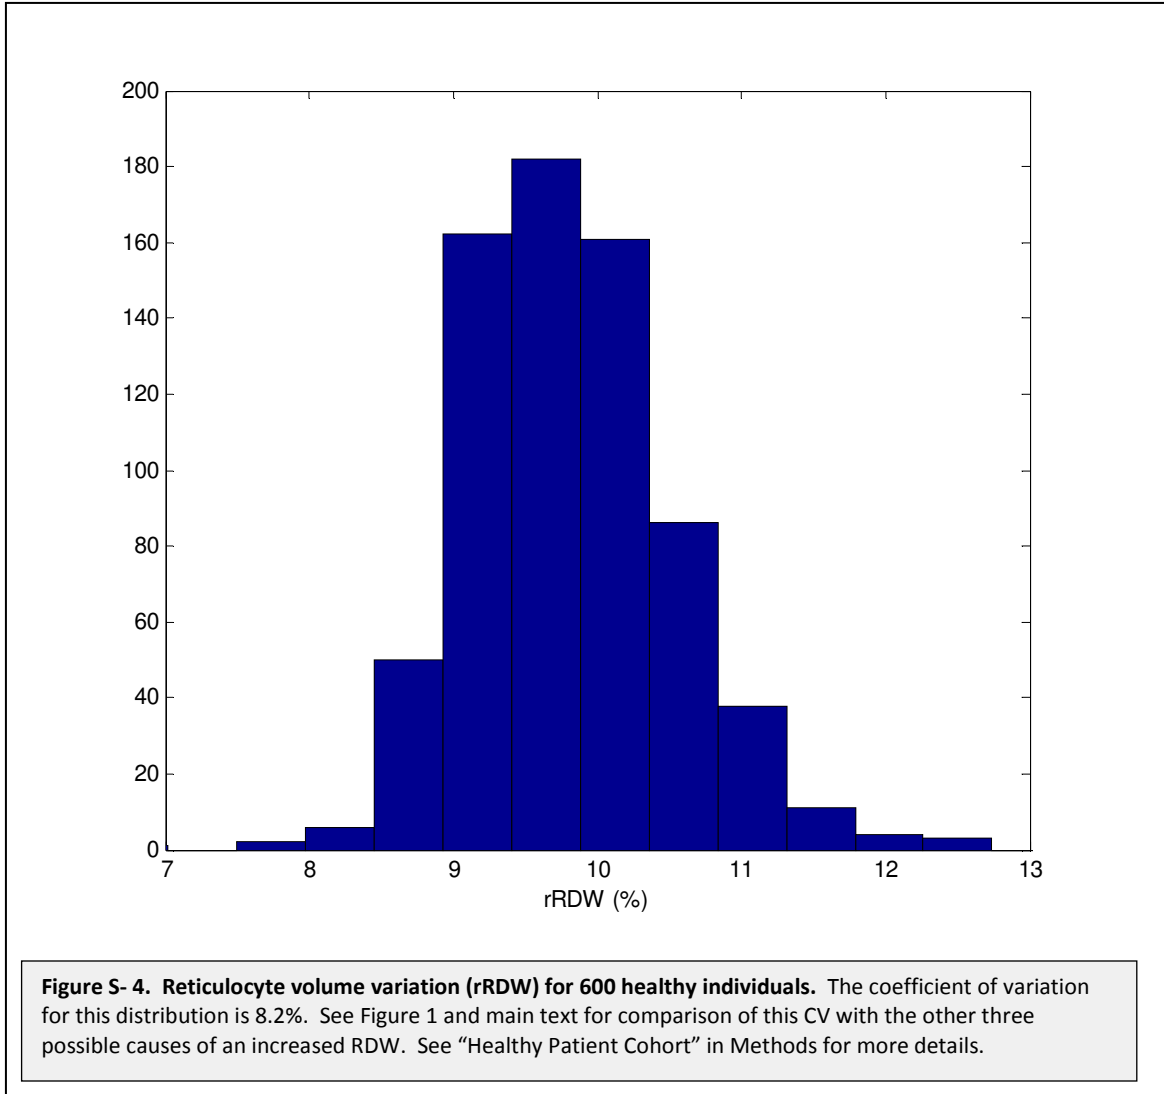

## RBC Population Dynamics in a Healthy Population

Figure S-5. Estimated Parameters for RBC Population Dynamics in a Healthy Population

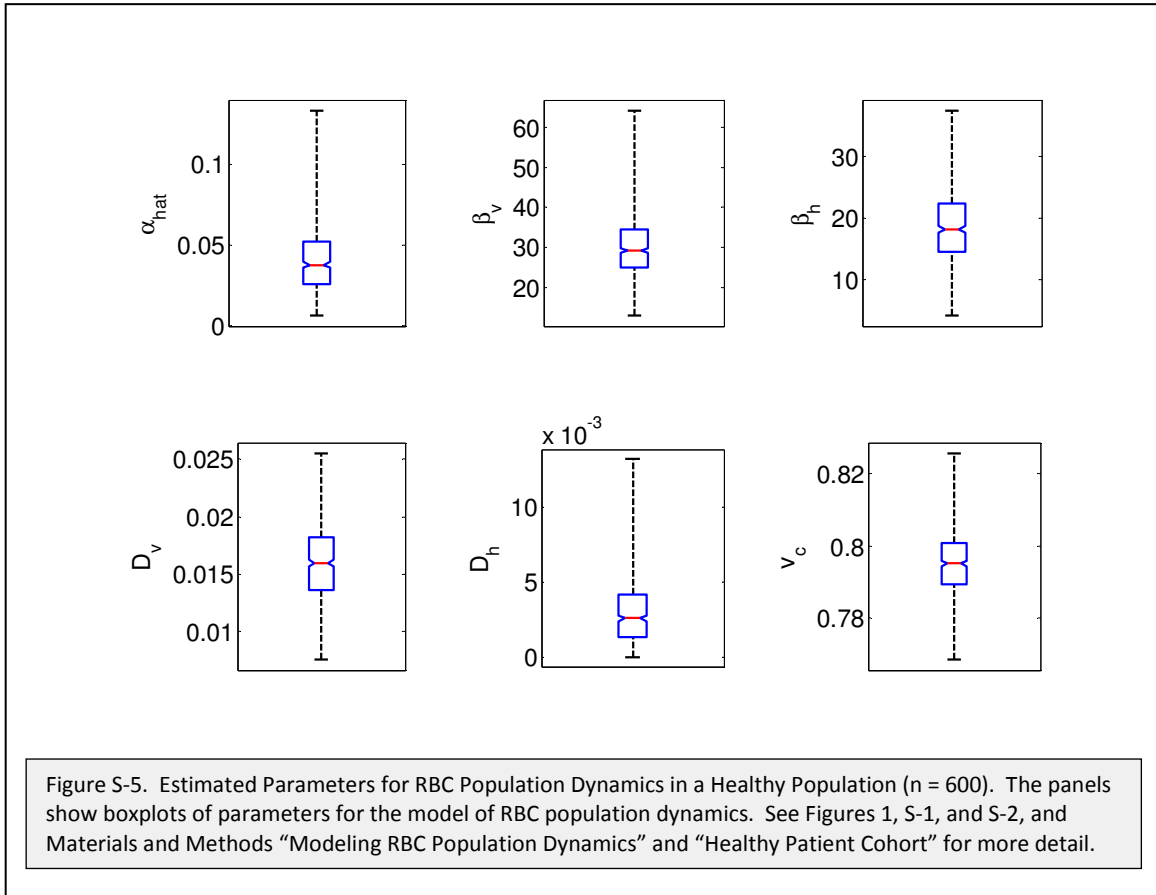



## Correlation Between RDW and Potential Causes of its Elevation.

Figure S-6. Correlation of RDW with possible cause for its elevation

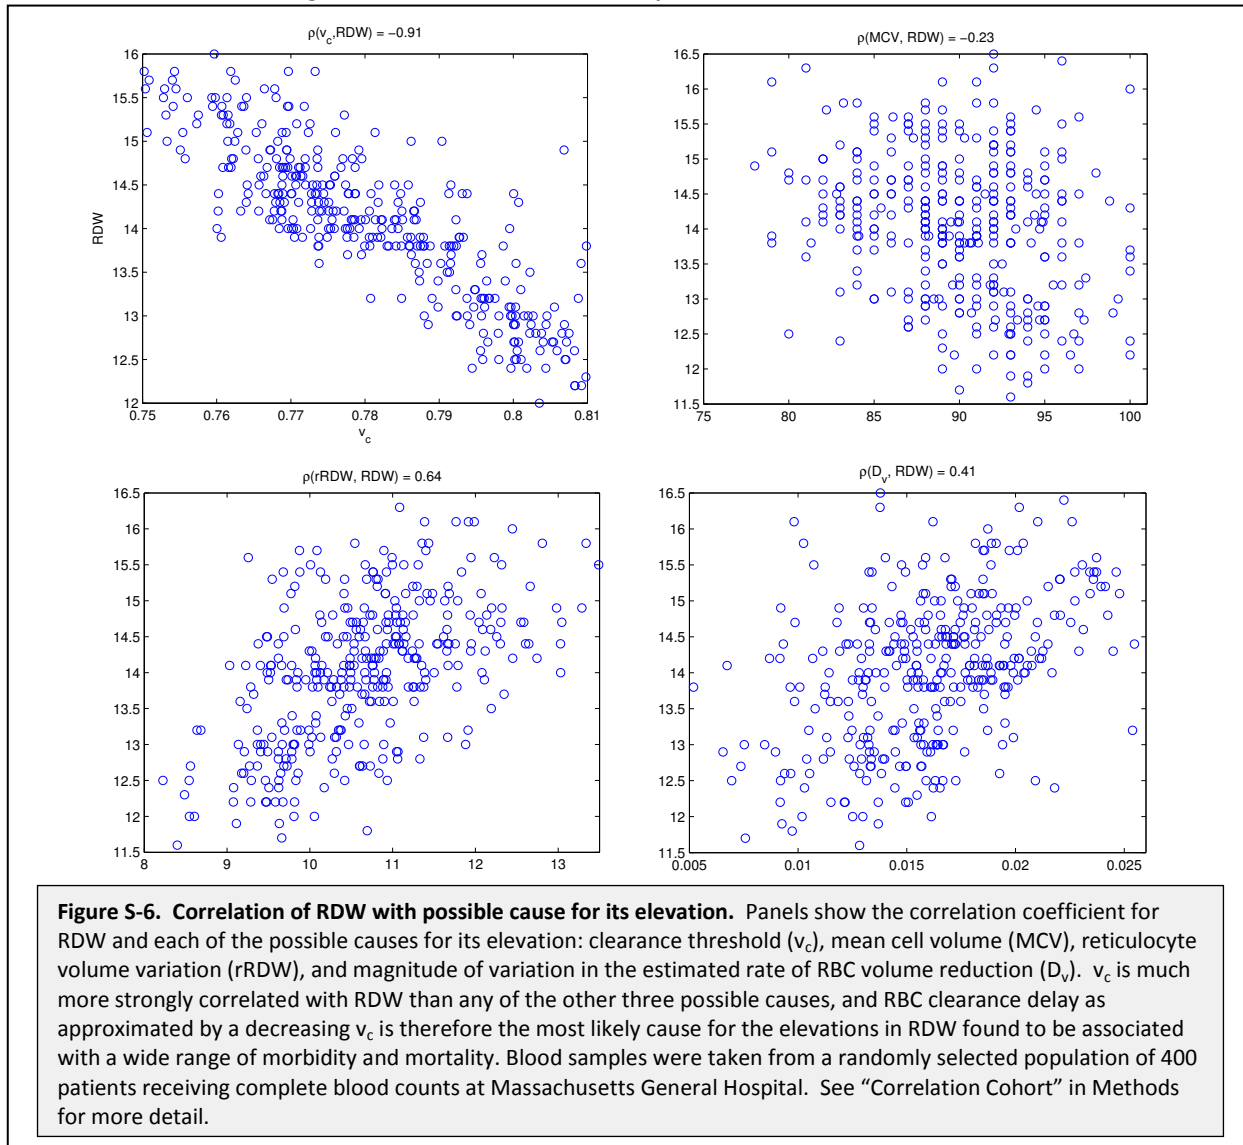

## Odds Ratios of Future Anemia for Thresholds of CBC parameters and $v_c$

We assessed the predictive value of  $v_c$  and the traditional CBC indices for future anemia. See Materials and Methods for “Case Control Study of  $v_c$ -based Prediction of All-Cause Anemia.” For each predictor, we let the diagnostic threshold vary across the measured range, as shown in Table S-1. Confidence intervals for odds ratios were calculated by assuming a log-normal distribution. Odds ratios statistically different from 1.0 are shown shaded.  $v_c$  has a statistically significant odds ratio across almost its entire measured range. HCT, HGB, MCH, MCHC, and MCV have no statistically significant odds ratios for any threshold value. RDW has thresholds with significant odds ratios, but the odds ratio (2.0) for the optimal threshold is less than  $\frac{1}{4}$  that for  $v_c$  (8.5).

**Table S3. Odds Ratios of Future Anemia for Thresholds of CBC parameters and v<sub>c</sub>**  
(Odds ratios statistically different from 1.0 are shaded.)

| Predictor      | Threshold     | Odds Ratio for Future Anemia | 95% Confidence Interval |             |
|----------------|---------------|------------------------------|-------------------------|-------------|
| v <sub>c</sub> | <b>0.7750</b> | <b>8.5</b>                   | <b>1.1</b>              | <b>63.4</b> |
|                | <b>0.7775</b> | <b>6.2</b>                   | <b>1.5</b>              | <b>26.1</b> |
|                | <b>0.7800</b> | <b>5.6</b>                   | <b>1.7</b>              | <b>18.5</b> |
|                | <b>0.7825</b> | <b>3.7</b>                   | <b>1.5</b>              | <b>8.8</b>  |
|                | <b>0.7850</b> | <b>3.1</b>                   | <b>1.5</b>              | <b>6.4</b>  |
|                | <b>0.7875</b> | <b>2.1</b>                   | <b>1.2</b>              | <b>3.7</b>  |
|                | <b>0.7900</b> | <b>1.8</b>                   | <b>1.1</b>              | <b>3.1</b>  |
|                | <b>0.7925</b> | <b>1.7</b>                   | <b>1.0</b>              | <b>2.7</b>  |
|                | 0.7950        | 1.5                          | 0.9                     | 2.3         |
| RDW            | 12.25         | 0.9                          | 0.3                     | 2.7         |
|                | 12.50         | 1.1                          | 0.6                     | 2.2         |
|                | 12.75         | 1.3                          | 0.8                     | 2.3         |
|                | <b>13.00</b>  | <b>1.9</b>                   | <b>1.2</b>              | <b>3.0</b>  |
|                | <b>13.25</b>  | <b>2.0</b>                   | <b>1.2</b>              | <b>3.2</b>  |
|                | <b>13.50</b>  | <b>1.9</b>                   | <b>1.1</b>              | <b>3.3</b>  |
|                | <b>13.75</b>  | <b>2.0</b>                   | <b>1.1</b>              | <b>3.8</b>  |
|                | 14.00         | 2.3                          | 0.9                     | 5.2         |
| 14.25          | 2.1           | 0.7                          | 6.1                     |             |
| HGB            | 12.5          | 0.8                          | 0.3                     | 2.1         |
|                | 13.0          | 1.2                          | 0.7                     | 2.1         |
|                | 13.5          | 0.9                          | 0.6                     | 1.4         |
|                | 14.0          | 0.9                          | 0.6                     | 1.4         |
|                | 14.5          | 0.7                          | 0.4                     | 1.1         |
|                | 15.0          | 0.5                          | 0.3                     | 1.0         |
| MCHC           | 32.5          | 1.2                          | 0.5                     | 3.0         |
|                | 33.0          | 1.4                          | 0.8                     | 2.4         |
|                | 33.5          | 1.1                          | 0.7                     | 1.7         |
|                | 34.0          | 0.9                          | 0.5                     | 1.5         |
|                | 34.5          | 1.0                          | 0.6                     | 1.9         |
|                | 35.0          | 0.9                          | 0.4                     | 2.2         |
| MCH            | 28.0          | 2.7                          | 0.8                     | 9.1         |
|                | 29.0          | 1.2                          | 0.6                     | 2.3         |
|                | 30.0          | 1.3                          | 0.8                     | 2.1         |
|                | 31.0          | 1.2                          | 0.8                     | 2.0         |
|                | 32.0          | 0.7                          | 0.4                     | 1.3         |
|                | 33.0          | 0.6                          | 0.2                     | 1.5         |
| MCV            | 80.0          | 0.3                          | 0.0                     | 5.3         |
|                | 83.0          | 0.7                          | 0.2                     | 2.4         |
|                | 86.0          | 1.4                          | 0.6                     | 3.1         |
|                | 89.0          | 1.7                          | 0.9                     | 3.0         |
|                | 92.0          | 1.1                          | 0.7                     | 1.8         |
|                | 95.0          | 1.2                          | 0.7                     | 2.1         |
| HCT            | 38.0          | 1.0                          | 0.5                     | 1.9         |
|                | 40.0          | 0.9                          | 0.5                     | 1.4         |
|                | 42.0          | 0.8                          | 0.5                     | 1.2         |
|                | 44.0          | 0.8                          | 0.5                     | 1.4         |
|                | 46.0          | 0.5                          | 0.2                     | 1.5         |
|                | 48.0          | 0.6                          | 0.1                     | 5.2         |

## Glycated Hemoglobin is Elevated in Non-Diabetics with Normal CBCs and Decreased Ferritin

Figure S-7. Decreased ferritin with normal CBC and low  $v_c$  is associated with longer RBC lifespan

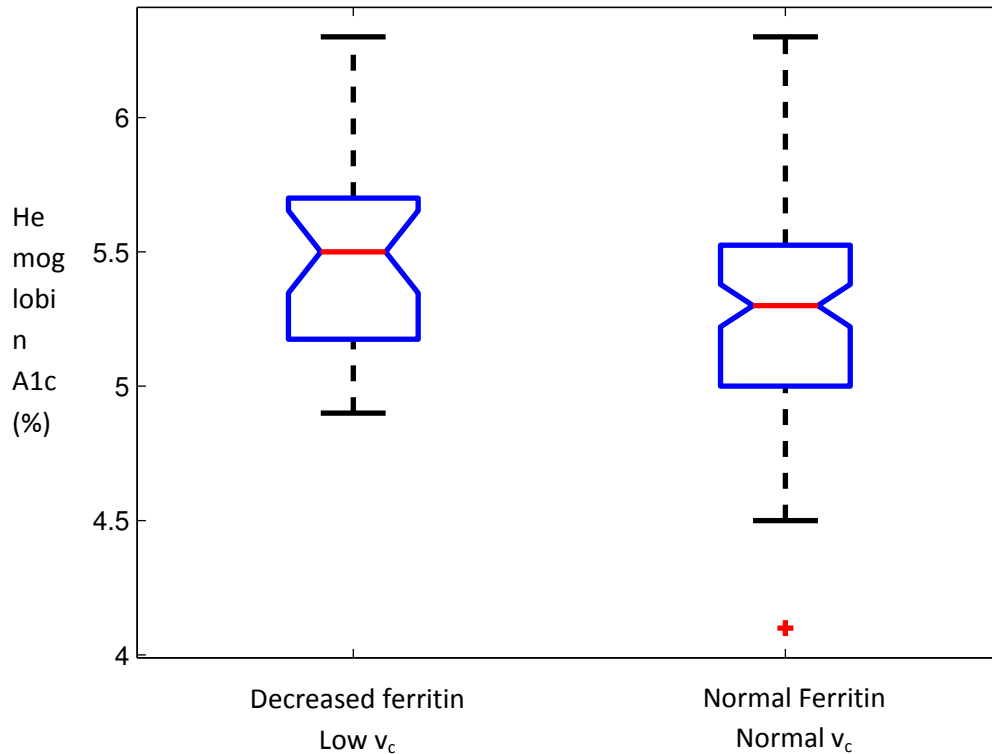

**Figure S-7. Decreased ferritin in patients with normal complete blood counts and low  $v_c$  is associated with longer RBC lifespan.** Boxplots of glycated hemoglobin in non-diabetics with normal CBCs and either (1) ferritin below the bottom 5% of the normal range and a low  $v_c$  or (2) ferritin above the bottom 5% of the reference range and normal  $v_c$ . Group 1 had 29 individuals with median A1c of 5.5% and median ferritin of 17 ng/ml. Group 2 had 109 individuals with median A1c of 5.3% and median ferritin of 107 ng/ml. See “Ferritin Cohort” in Methods for more detail.

1. Higgins JM, Mahadevan L. Physiological and pathological population dynamics of circulating human red blood cells. *Proc Natl Acad Sci U S A* 2010;107:20587-20592.
2. Franco RS, Puchulu-Campanella ME, Barber LA, et al. Changes in the properties of normal human red blood cells during in vivo aging. *Am J Hematol* 2013;88:44-51.
3. Willekens FLA, Roerdinkholder-Stoelwinder B, Groenen-Dopp YAM, et al. Hemoglobin loss from erythrocytes in vivo results from spleen-facilitated vesiculation. *Blood* 2003;101:747-751.

4. Gifford SC, Derganc J, Shevkoplyas SS, et al. A detailed study of time-dependent changes in human red blood cells: from reticulocyte maturation to erythrocyte senescence. *Br J Haematol* 2006;135:395-404.
5. Willekens FLA, Werre JM, Groenen-Dop YAM, et al. Erythrocyte vesiculation: a self-protective mechanism? *Br J Haematol* 2008;141:549-556.
6. Franco RS. The measurement and importance of red cell survival. *Am J Hematol* 2009;84:109-114.
7. Saitta G, Catalano C, Arsenio AC, et al. GLYCOSYLATED HEMOGLOBIN IN CARRIERS OF BETA-THALASSEMIA TRAIT. *British Medical Journal* 1984;289:1382-1383.
8. Ellis G, Diamandis EP, Giesbrecht EE, et al. AN AUTOMATED HIGH-PRESSURE LIQUID-CHROMATOGRAPHIC ASSAY FOR HEMOGLOBIN-A1C. *Clinical Chemistry* 1984;30:1746-1752.
9. Coban E, Ozdogan M, Timuragaoglu A. Effect of iron deficiency anemia on the levels of hemoglobin A1c in nondiabetic patients. *Acta Haematologica* 2004;112:126-128.
10. Polage C, Little RR, Rohlfing CL, et al. Effects of beta thalassemia minor on results of six glyated hemoglobin methods. *Clin Chim Acta* 2004;350:123-128.
